# Supplementary material for: Documentary-based climate reconstructions in the Czech Lands 1501–2020 CE and their European context
Source: Copernicus journal article supplement (doi:10.5194/cp-18-935-2022), 2022-04-29
Supplement: Supplementary file 1 [file cp-18-935-2022-supplement.pdf]

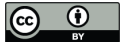

*Supplement of*

## **Documentary-based climate reconstructions in the Czech Lands 1501–2020 CE and their European context**

**Rudolf Brázdil et al.**

*Correspondence to:* Rudolf Brázdil (brazdil@sci.muni.cz)

The copyright of individual parts of the supplement might differ from the article licence.

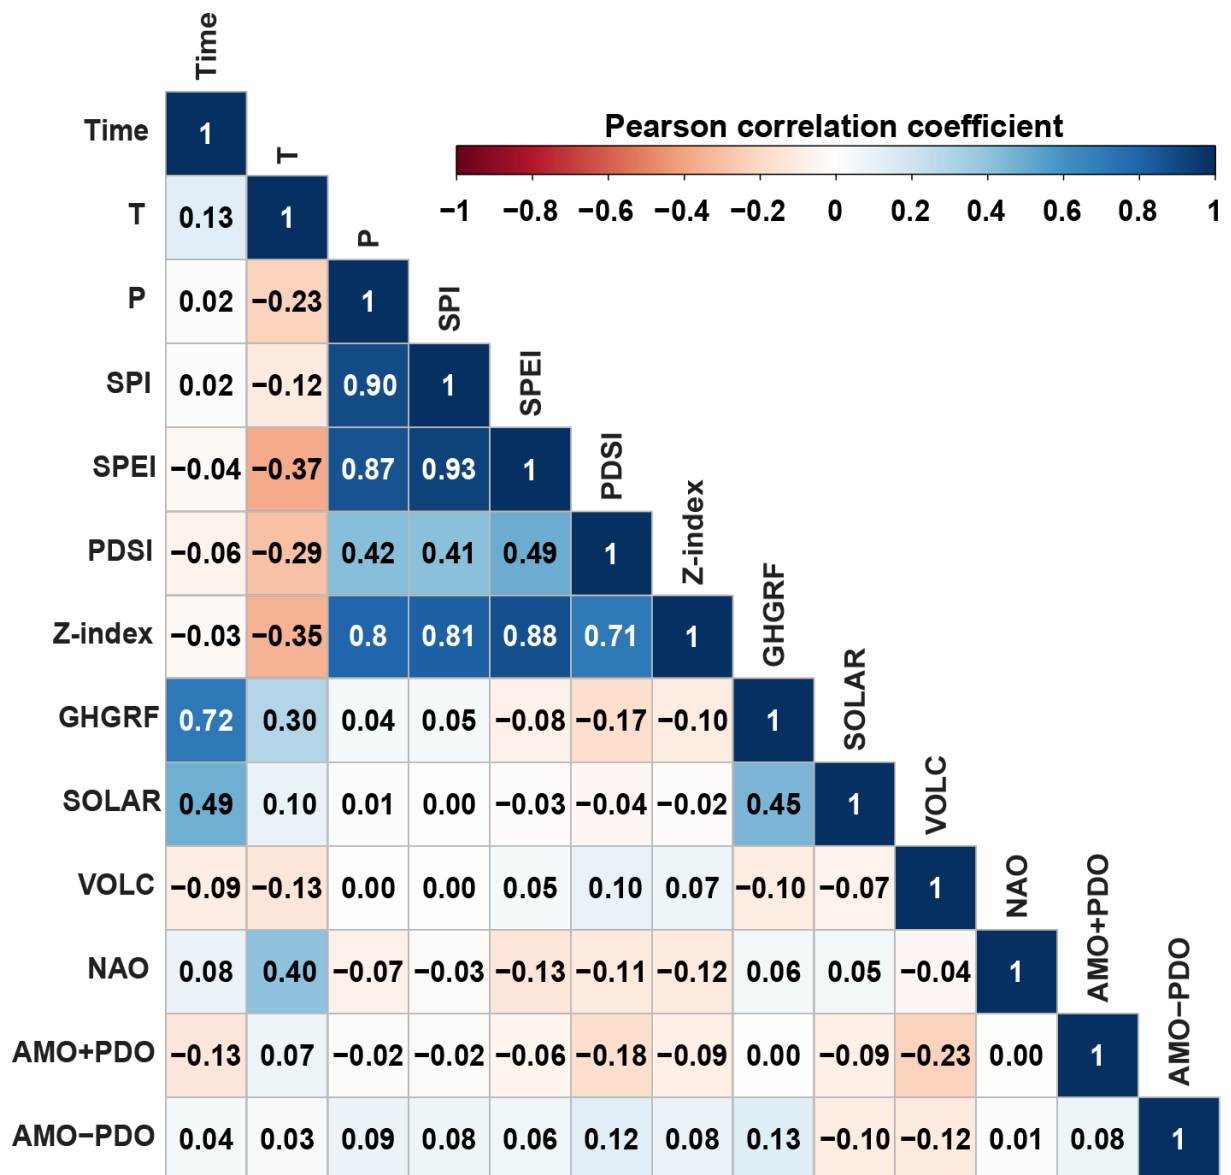

**Figure S1.** Pairwise Pearson correlation coefficients between individual targets and explanatory variables in seasonal time steps (see Fig. 2 for correlations in annual time steps).

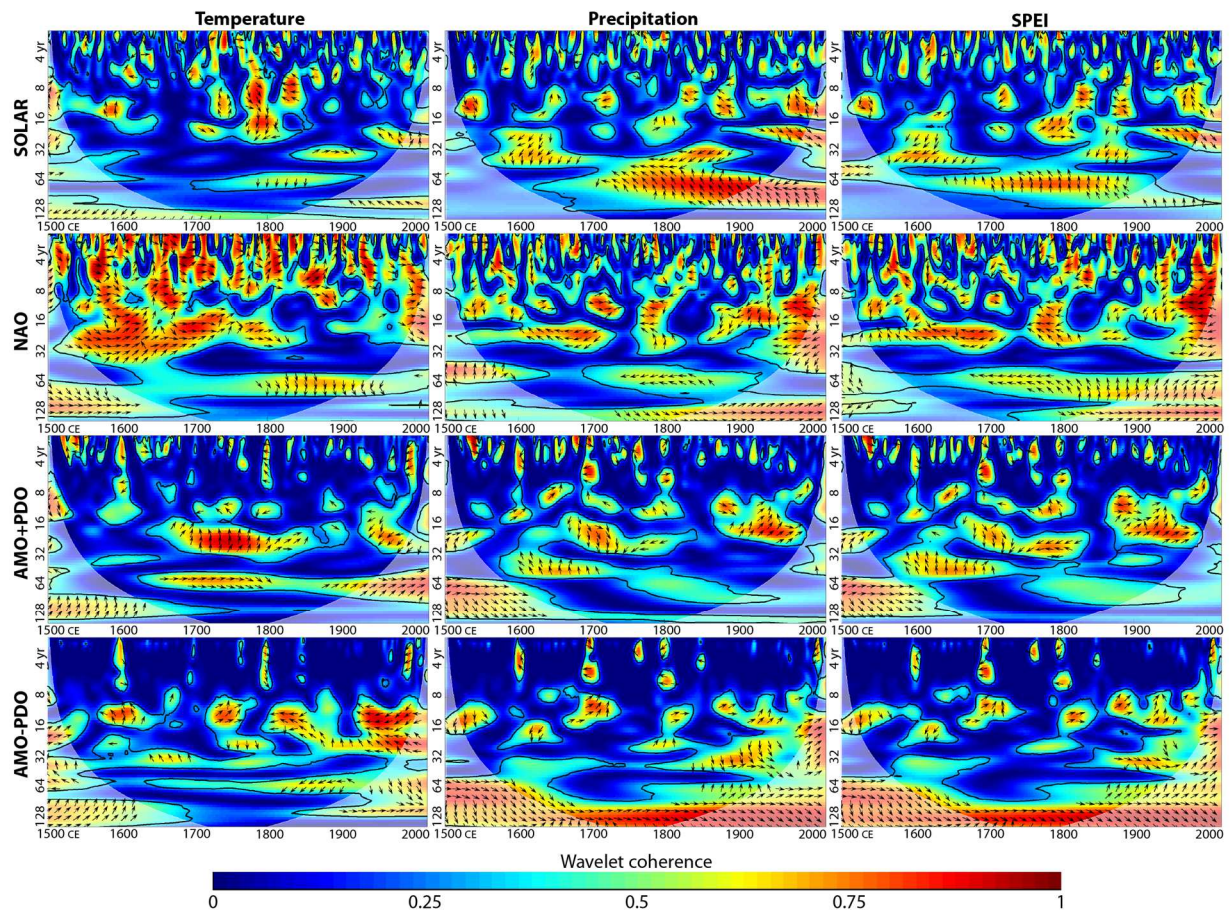

**Figure S2.** Wavelet coherence between series of temperature, precipitation or SPEI and explanatory variables with prominent oscillatory components (all seasons). Arrows show local phase shifts of the two series (only displayed for coherences in excess of 0.5); areas with statistically significant coherences are enclosed by black lines (95% confidence level).
